# Supplementary material for: Highly efficient β-lactamase assay applying poly-dimethylacrylamide-based surface functionalization with β-lactam antibiotics and β-lactamase inhibitors
Source: Royal Society of Chemistry journal article supplement (doi:10.1039/d3lc00682d), 2023-01-01
Supplement: d3lc00682d1.pdf [file d3lc00682d1.pdf]

## Supplementary Information

### Highly efficient $\beta$ -lactamase assay applying Poly-Dimethylacrylamide-based surface functionalization with $\beta$ -lactam antibiotics and $\beta$ -lactamase inhibitors

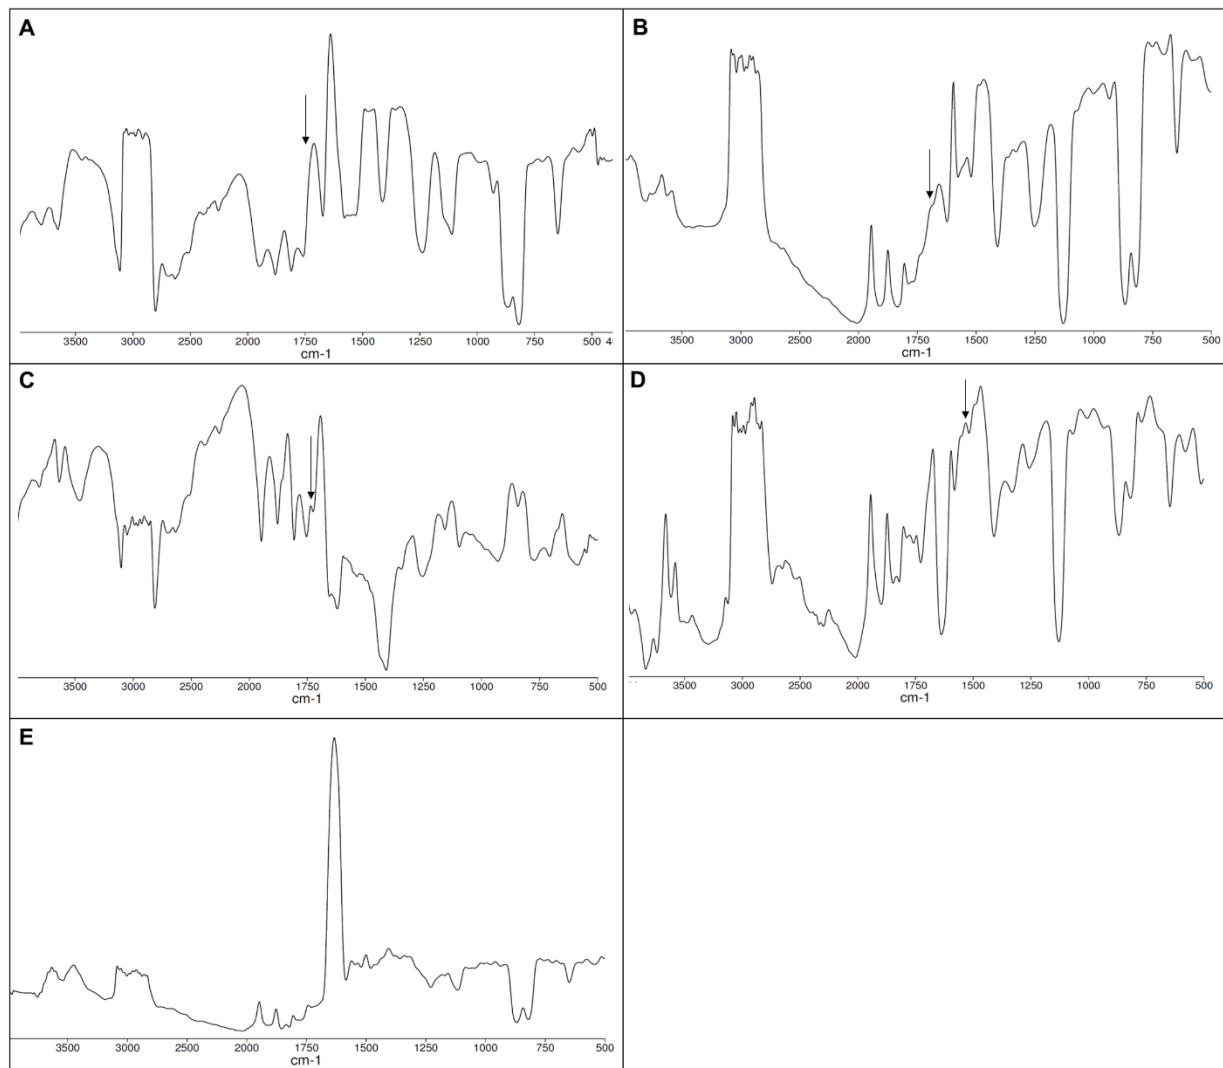

**Fig. S1** Recorded Fourier transform-infrared spectra of  $\beta$ -lactam antibiotics and  $\beta$ -lactamase inhibitors crosslinked with PDMA-MBP on polypropylene plates. (A) ampicillin, (B) cefoperazone, (C) sulbactam and (D) relebactam. Spectra were recorded in the range of 4000 – 400  $\text{cm}^{-1}$ . Relevant peaks are marked with arrows.

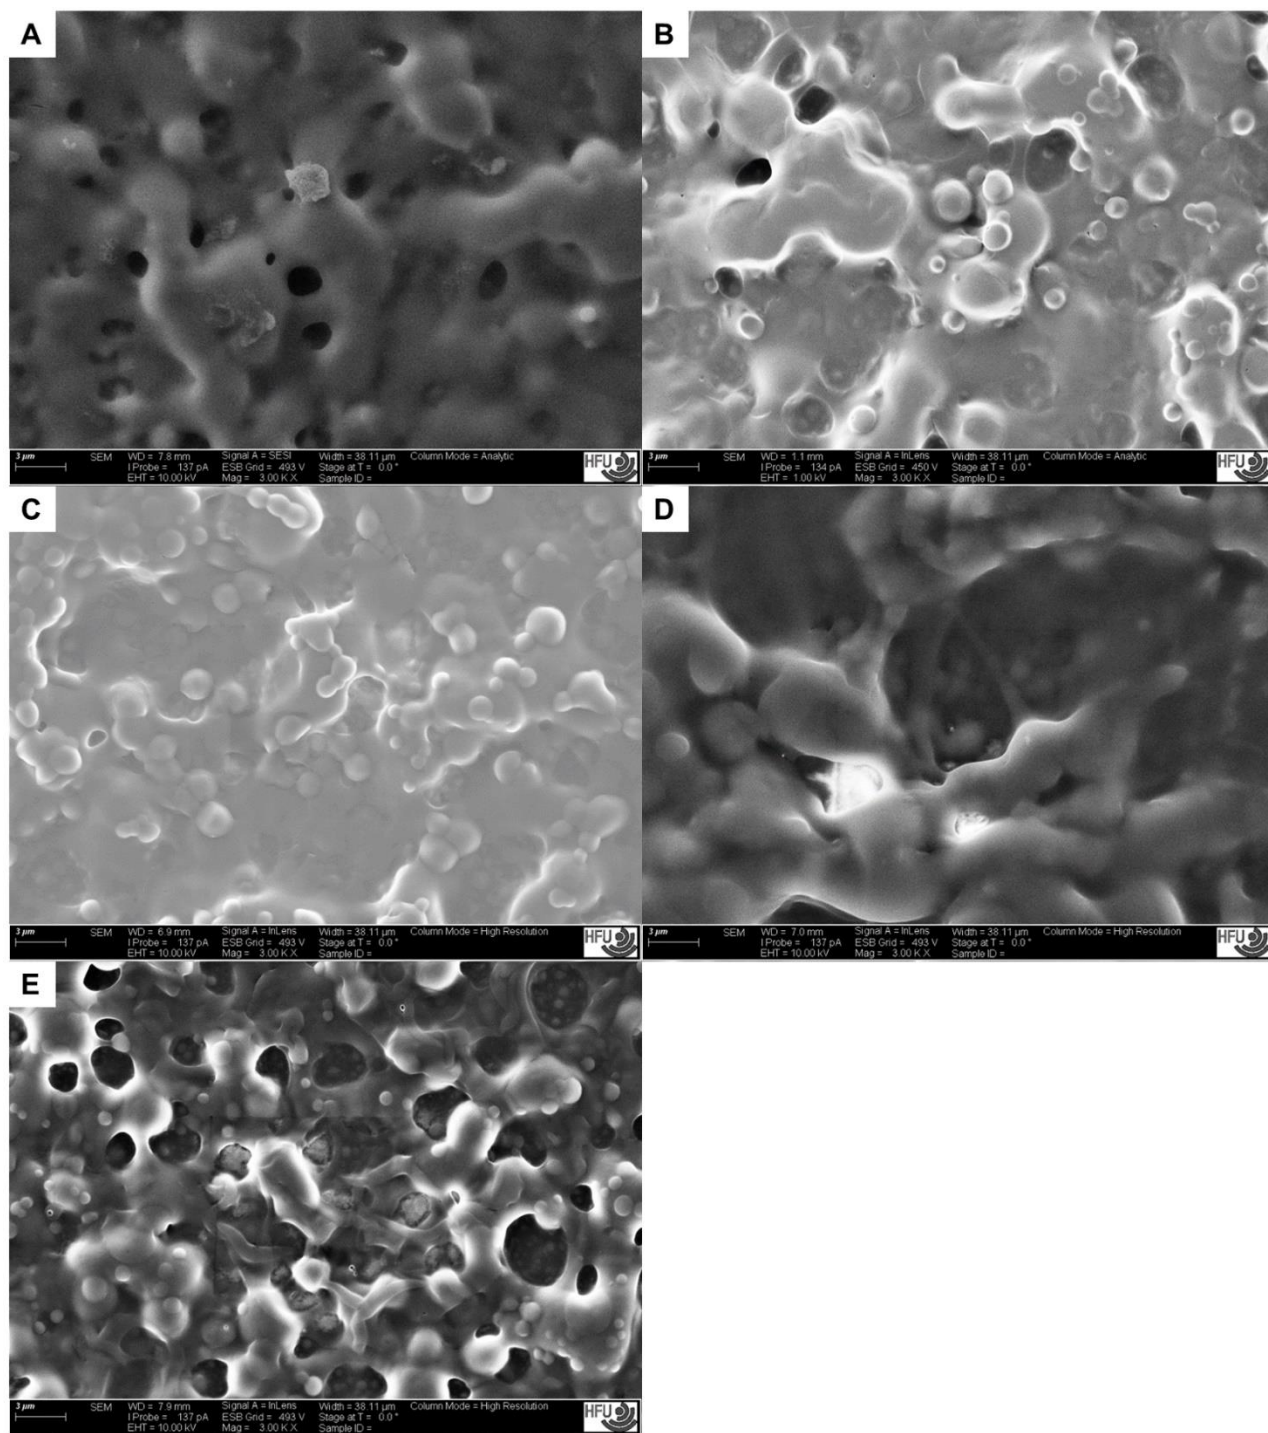

**Fig. S2** SEM images of the PDMA coatings crosslinked with different  $\beta$ -lactam antibiotics and  $\beta$ -lactamase inhibitors. (A) PDMA, (B) PDMA with meropenem, (C) PDMA with aztreonam, (D) PDMA with ampicillin, (E) PDMA with cefoperazone.

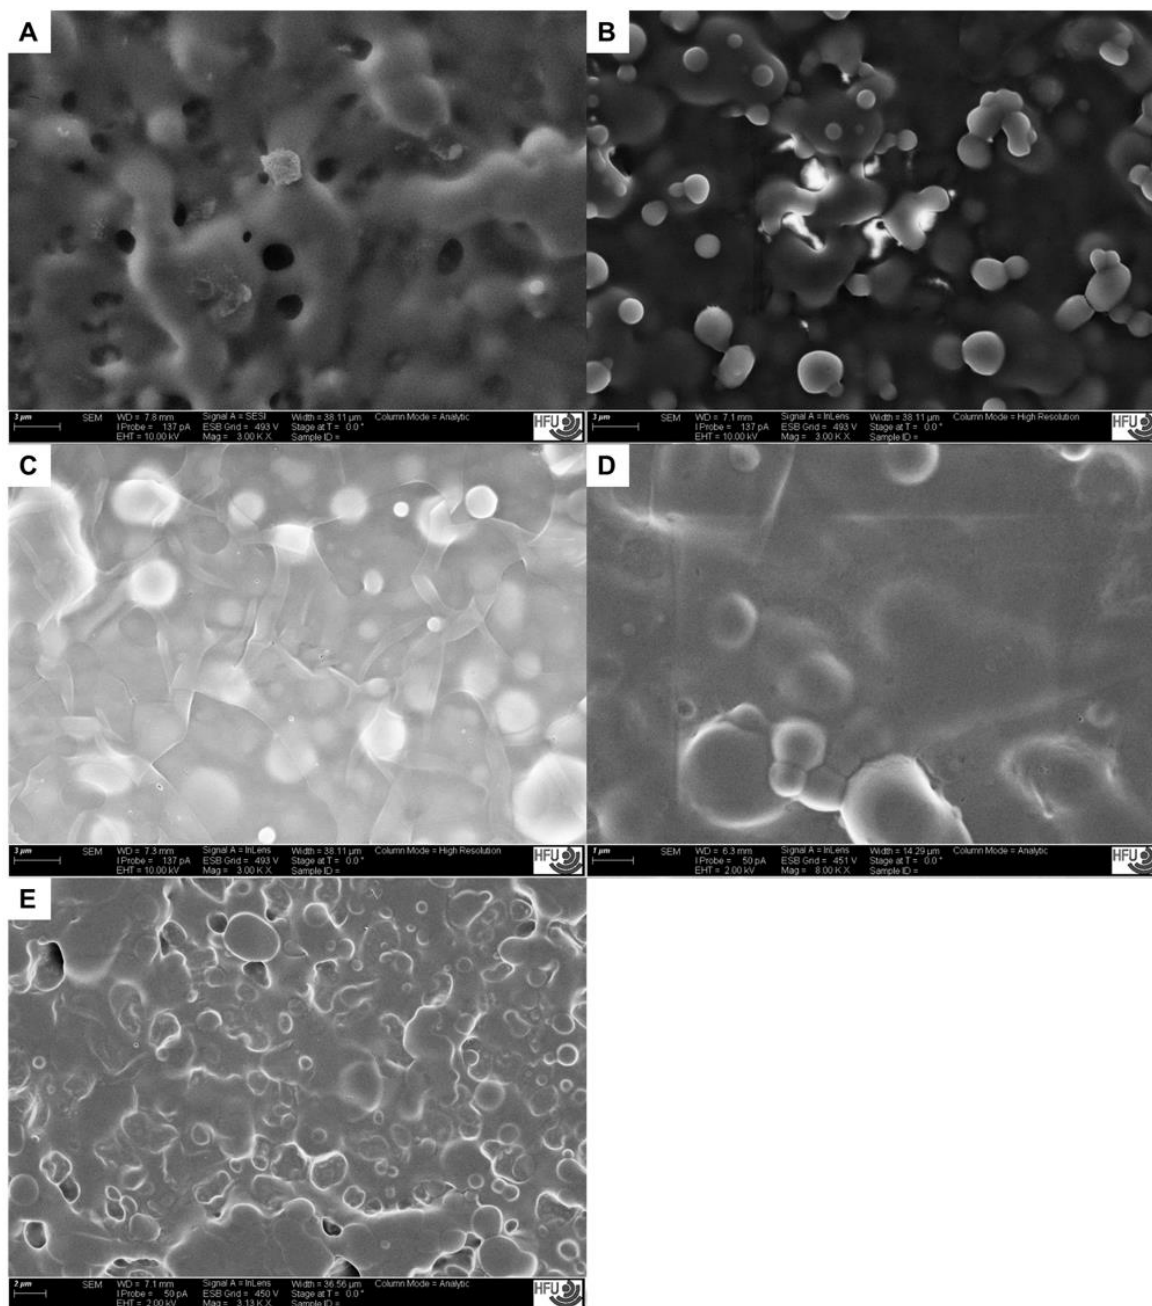

**Fig. S3** SEM images of the PDMA coatings crosslinked with different  $\beta$ -lactamase inhibitors. (A) PDMA, (B) PDMA with avibactam, (C) PDMA with tazobactam, (D) PDMA with sulbactam and (E) PDMA with relebactam.

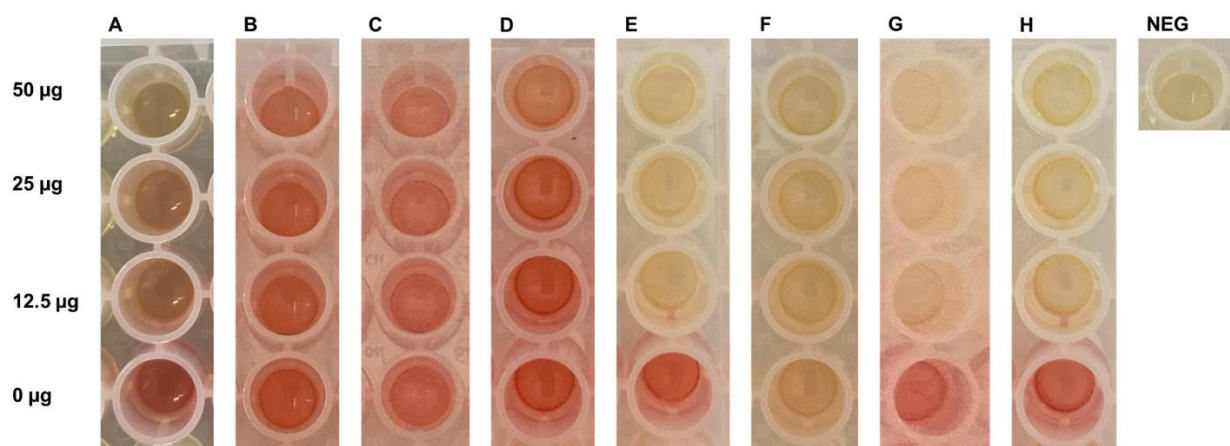

**Fig. S4 Images of the  $\beta$ -lactamase inhibition assays for the determination of the effect of different amounts of immobilized  $\beta$ -lactam-antibiotics and  $\beta$ -lactamase inhibitors.** Colour change of nitrocefin substrate turnover of different recombinant  $\beta$ -lactamases after preincubation in microplate wells modified with 50, 25 and 12.5  $\mu\text{g}$  of various  $\beta$ -lactam antibiotics and  $\beta$ -lactamase inhibitors prepared by UV-crosslinking via PDMA. (A) ampC incubated on meropenem, (B) OXA-23 on aztreonam, (C) ampC on ampicillin, (D) OXA on cefoperazone, (E) ampC on avibactam, (F) “SiA1” lactamase blend on tazobactam, (G) ampC incubated on sulbactam and (H) ampC on relebactam.

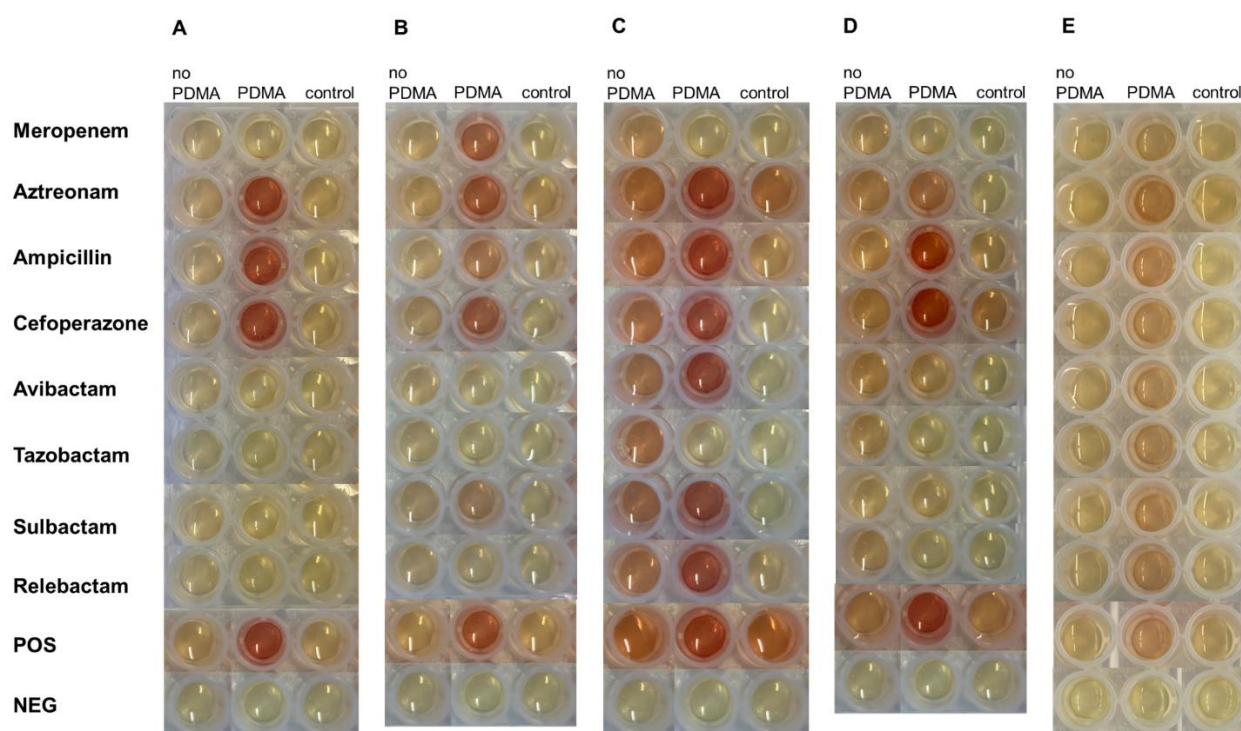

**Fig. S5: Images of  $\beta$ -lactamase (recombinant) inhibition assay in microplate wells functionalized with  $\beta$ -lactam-antibiotics and  $\beta$ -lactamase inhibitors.** Colour change of nitrocefin substrate turnover of different recombinant  $\beta$ -lactamases (A) TEM-1, (B) “SiA1”-lactamase blend, (C) OXA-23, (D) ampC and (E) IMP-4 after preincubation in microplate wells modified with 50  $\mu\text{g}$  of various  $\beta$ -lactam antibiotics and  $\beta$ -lactamase inhibitors prepared by UV-crosslinking via PDMA (“PDMA”). To verify the functionality of the wells modified with PDMA and  $\beta$ -lactam-antibiotics/ $\beta$ -lactamase inhibitors, inhibition assays in solution were performed as reference experiments (“control”). Therefore,  $\beta$ -lactamases were added to each well of an untreated 96-well plate and preincubated with  $\beta$ -lactam antibiotic/ $\beta$ -lactamase inhibitor in solution, followed by the addition of nitrocefin. To exclude nonspecific binding of the  $\beta$ -lactam antibiotics/ $\beta$ -lactamase inhibitors to the wells, wells without PDMA were prepared as controls (“no PDMA”). Therefore, only the  $\beta$ -lactam antibiotics/ $\beta$ -lactamase inhibitors were added and crosslinked with UV in the wells. High

activity of lactamases was detected in each of these “no PDMA”-control wells. Therefore, nonspecific binding of the antibiotics/inhibitors to the wells can be excluded.

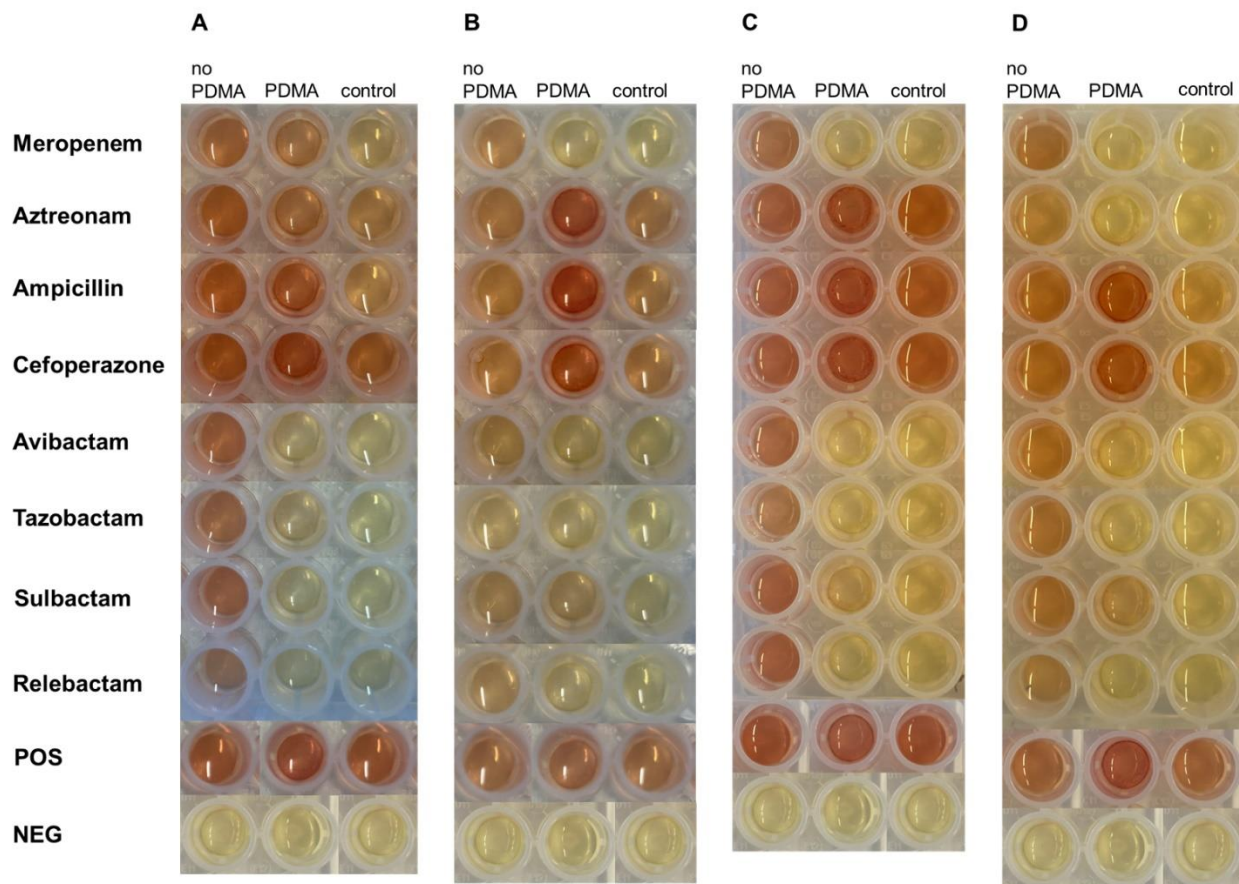

**Fig. S6 Images of  $\beta$ -lactamase (recombinant) inhibition assay in microplate wells functionalized with  $\beta$ -lactam-antibiotics and  $\beta$ -lactamase inhibitors.** Colour change of nitrocefin substrate turnover of different recombinant  $\beta$ -lactamases (A) *Acinetobacter baumannii*, (B) *Escherichia coli*, (C) *Klebsiella pneumoniae* and (D) *Pseudomonas aeruginosa* after preincubation in microplate wells modified with 50  $\mu$ g of various  $\beta$ -lactam antibiotics and  $\beta$ -lactamase inhibitors prepared by UV-crosslinking via PDMA (“PDMA”). To verify the functionality of the wells modified with PDMA and  $\beta$ -lactam-antibiotics/ $\beta$ -lactamase inhibitors, inhibition assays in solution were performed as reference experiments (“control”). Therefore,  $\beta$ -lactamases were added to each well of an untreated 96-well plate and pre-incubated with  $\beta$ -lactam antibiotic/ $\beta$ -lactamase inhibitor in solution, followed by the addition of nitrocefin. To exclude nonspecific binding of the  $\beta$ -lactam antibiotics/ $\beta$ -lactamase inhibitors to the wells, wells without PDMA were prepared as controls (“no PDMA”). Therefore, only the  $\beta$ -lactam antibiotics/ $\beta$ -lactamase inhibitors were added and crosslinked with UV in the wells. High activity of lactamases was detected in each of these “no PDMA”-control wells. Therefore, nonspecific binding of the antibiotics/inhibitors to the wells can be excluded.
